# Supplementary material for: Surface functionalization-enhanced magnetism in SnO2nanoparticles and its correlation to photoluminescence properties
Source: Royal Society of Chemistry journal article supplement (doi:10.1039/c4tc02210f), 2014-11-25
Supplement: c4tc02210f1.pdf [file c4tc02210f1.pdf]

## Supporting information

# Surface functionalization induced magnetism in SnO<sub>2</sub> nanoparticles and its correlation to Photoluminescence properties

Venkataramana Bonu,<sup>a</sup> Arindam Das,<sup>\*a</sup> Manas Sardar,<sup>\*b</sup> Sandip Dhara,<sup>a</sup> and Ashok Kumar Tyagi<sup>a</sup>

<sup>a</sup> Surface and Nanoscience Division, <sup>b</sup> Materials Physics Division, Indira Gandhi Centre for Atomic Research, Kalpakkam-603102, India

Octadecyltrichlorosilane (OTS) molecules are linked to SnO<sub>2</sub> nanoparticles (NPs) through a self-assembly process by forming covalent bonds. Figure S1 shows the Raman spectra of OTS treated SnO<sub>2</sub> NPs, which show the allowed modes for rutile SnO<sub>2</sub> phase along with molecular vibrations from OTS molecules. Peak around 570 cm<sup>-1</sup>(*D*) is due to in-plane 'O' vacancy.<sup>1</sup> Raman spectroscopy has been widely used to understand ordered and disordered phases of the covalently bonded OTS to silica surfaces.<sup>2,3</sup> Molecular vibrations originating from the breadth and asymmetry of CH<sub>2</sub> twist ( $\tau$ -CH<sub>2</sub>) and bending of CH<sub>2</sub> ( $\delta$ -CH<sub>2</sub>) modes were observed at 1293, and 1441 cm<sup>-1</sup>, respectively (Fig. S1). Similarly symmetric ( $\nu_s$ ) and asymmetric ( $\nu_a$ ) stretching modes of CH<sub>2</sub> and CH<sub>3</sub> modes were also shown in Figure S1. Vibrational modes of  $\nu_s$ (CH<sub>2</sub>) and  $\nu_a$ (CH<sub>2</sub>) were observed at 2846 and 2881 cm<sup>-1</sup>, respectively whereas the same for  $\nu_s$ (CH<sub>3</sub>) and  $\nu_a$ (CH<sub>3</sub>) appeared at 2935 and 2962 cm<sup>-1</sup>, respectively. In the ordered phase of OTS,  $\tau$ -CH<sub>2</sub> mode was reported to shift to lower frequency in comparison to the disordered phase of OTS at 1304 cm<sup>-1</sup>. The  $\tau$ -CH<sub>2</sub> mode at 1294 cm<sup>-1</sup> supports the formation of an ordered OTS on the SnO<sub>2</sub> surfaces. Moreover, the intensity ratio of  $\nu_a$ (CH<sub>2</sub>) to  $\nu_s$ (CH<sub>2</sub>) is described to be higher than 0.9 for the ordered phase. In the present study, intensity ratio of the above modes exhibits around 1.3 extending support to the formation of ordered OTS on SnO<sub>2</sub> surfaces. The intensity ratio, however is found to be lower than the reported value of 1.6 - 2 for the crystalline phase of OTS on micron sized silica surfaces.<sup>2,3</sup> In the present context, spherical NPs of SnO<sub>2</sub> allows only limited surface area for the ordering to be observed.

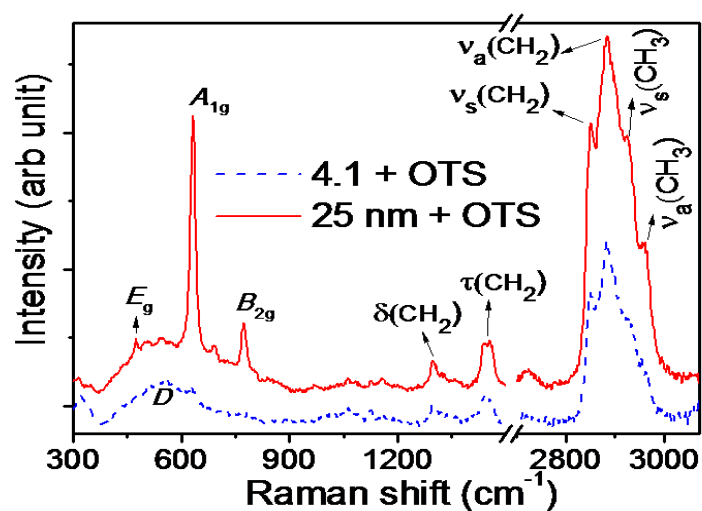

Fig. S1 Raman spectra of OTS treated SnO<sub>2</sub> nanoparticles of 4 nm, and 25 nm

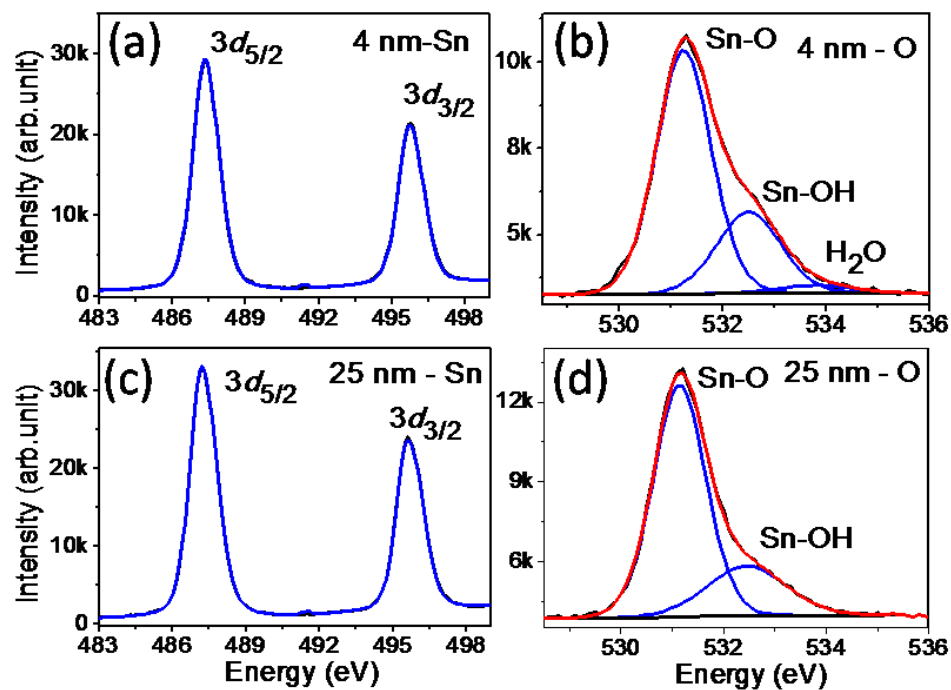

Fig. S2 XPS spectra of (a) Sn 3d (b) O 1s of SnO<sub>2</sub> (4 nm) and (c) Sn 3d (b2) O 1s of SnO<sub>2</sub> (25 nm).

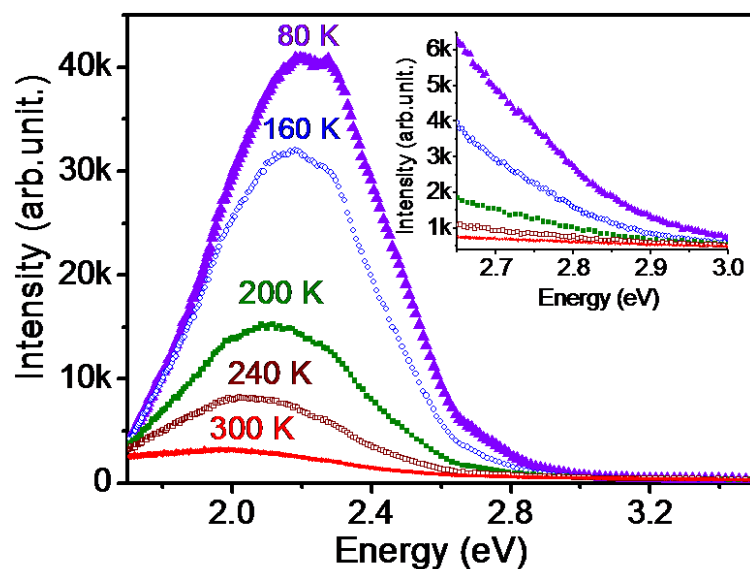

Fig. S3 Temperature dependent photoluminescence of pristine 25 nm SnO<sub>2</sub> nanoparticles. Inset showing the zoomed region between 2.65 to 3 eV.

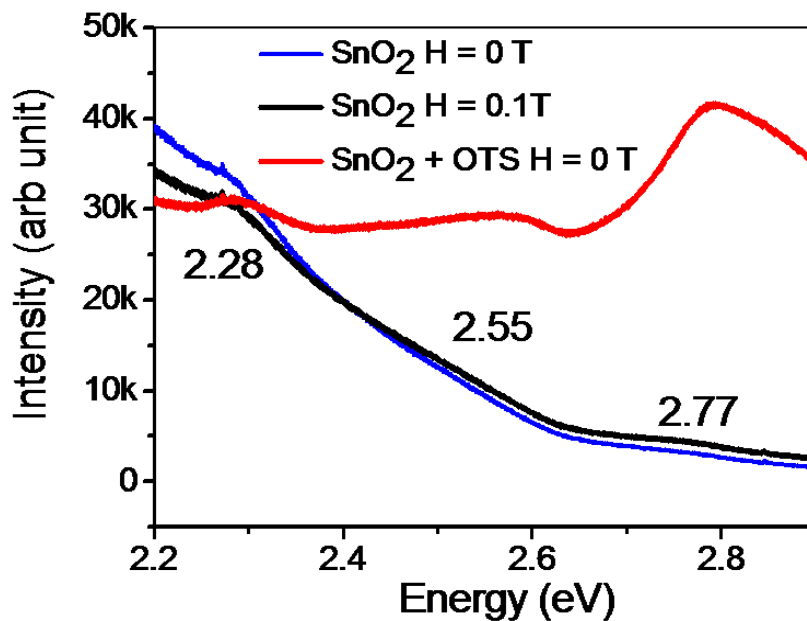

Fig. S4 Zoomed region of Fig. 4 showing no new peak after functionalization.

## REFERENCES

- 1) L. Z. Liu, X. L. Wua, F. Gaoa, J. C. Shena, T. H. Li, P. K. Chu. *Solid State Communications*, 2011, **151**, 811.

- 2) H. Mankit, M. Cai, J. E. Pemberton, *Anal. Chem.* 1997, **69**, 2613.
- 3) J. E. Pemberton, H. Mankit, J. O. Christopher, W. M. Ducey, *J. Chromatogr. A*, 2001, **913**, 243.
